# Supplementary material for: C70 vs. C60 in zinc porphyrin—fullerene dyads: prolonged charge separation and ultrafast energy transfer from the second excited singlet state of porphyrin
Source: Royal Society of Chemistry journal article supplement (doi:10.1039/b210127k), 2003-03-01
Supplement: b210127k.doc [file b210127k.doc]

# C70 *vs.* C60 in zinc porphyrin­–fullerene dyads: prolonged charge separation and ultrafast energy transfer from the second excited singlet state of porphyrin

# Supplementary data

**Synthesis of ZnP-C1-C70**

**H2P-C1-C70:** To a stirred solution of [1,9]methano-fullerene[70] carboxylic acid (55.3 mg, 0.0615 mmol), HOBT (13.8 mg, 0.0901 mmol) in 12 mL of bromobenzene-DMSO (5:1) was added under nitrogen atmosphere DCC (64.4 mg, 0.312 mmol) followed by 5-(4-aminomethylphenyl)-10,15,20-tris­(3,5-di-*tert*­butylphenyl)­poprhyrin (66.6 mg, 0.0679 mmol). The reaction was stirred at room temperature for 20 h after which the solvent was evaporated to yield a black solid. Flash column chromatography on silica gel with benzene as an eluent (Rf=0.30) and subsequent reprecipitation from chloroform-methanol gave **H2P-C1-C70** as a dark purple solid (60% yield, 69.0 mg, 0.0371 mmol). mp>300°C; 1H NMR (270 MHz, CDCl3-CS2 (1:1))  8.84 (d, J=5 Hz, 2H), 8.83 (d, J=5 Hz, 2H), 8.80 (s, 4H), 8.34 (d, J=8 Hz, 2H), 8.05 (s, 6H), 7.86 (d, J=8 Hz, 2H), 7.78 (s, 3H), 6.77 (t, J=5 Hz, 1H), 4.97 (d, J=5 Hz, 2H), 2.54 (s, 1H), 1.54 (s, 54H), -2.91 (br.s, 2H); MS (FAB) 1861 (M+H+); 13C NMR (101MHz, CDCl3-CS2 (5:1))  164.27, 154.96, 153.87, 150.71, 150.53, 150.27, 150.22, 149.89, 149.77, 149.72, 149.57, 148.63, 148.54, 148.28, 148.19, 147.99, 147.81, 147.64, 147.47, 147.45, 147.39, 147.35, 146.83, 146.73, 146.47, 146.36, 146.29, 146.18, 145.78, 145.60, 145.35, 144.90, 144.79, 144.30, 143.85, 142.77, 142.74, 142.41, 142.35, 142.29, 142.18, 142.14, 141.46, 141.16, 141.01, 140.80, 139.65, 138.45, 137.42, 136.84, 136.73, 136.34, 135.03, 132.48, 131.84, 131.51, 130.89, 129.75, 129.70, 129.65, 129.61, 129.41, 128.54, 126.46, 121.74, 121.44, 121.03, 118.70, 64.25 (C70-sp3), 63.17 (C70-sp3), 44.47 (-CH2-C6H4-), 34.89, 31.76, 29.86, 25.25 (-CH-).

**ZnP-C1-C70:** A saturated methanol solution of Zn(OAc)2 (11 mL) was added to a solution of **H2P-C1-C70** (51.9 mg, 0.0279 mmol) in CHCl3 (150 mL) and refluxed for 1 h. After cooling, the reaction mixture was washed with water twice, dried over anhydrous Na2SO4, and then the solvent was evaporated. Flash column chromatography on silica gel with benzene as an eluent (Rf=0.25) and subsequent reprecipitation from chloroform-methanol gave **ZnP-C1-C70** as a dark grayish purple solid (93% yield, 49.9 mg, 0.0259 mmol). mp>300°C; 1H NMR (270 MHz, CDCl3-CS2 (5:1))  9.02 (d, J=5 Hz, 2H), 8.94 (d, J=5 Hz, 2H), 8.93 (s, 4H), 8.36 (d, J=8 Hz, 2H), 8.08 (d, J=2 Hz, 4H), 8.03 (d, J= 2 Hz, 2H), 7.84 (d, J=8 Hz, 2H), 7.79 (t, J=2 Hz, 2H), 7.75 (t, J=2 Hz, 1H), 6.63 (t, J=5 Hz, 1H), 4.95 (d, J=5 Hz, 2H), 2.83 (s, 1H), 1.52 (s, 54H); MS (FAB) 1923 (M+H+).
